# Supplementary material for: Additive-regulated one-step dynamic spin-coating for fabricating high-performance perovskite solar cells under high humidity conditions
Source: Royal Society of Chemistry journal article supplement (doi:10.1039/d3tc03529h), 2023-12-07
Supplement: d3tc03529h1.pdf [file d3tc03529h1.pdf]

# **Additive-Regulated One-Step Dynamic Spin-Coating for Fabricating High-Performance Perovskite Solar Cells under High Humidity Conditions**

*Tailin Wang<sup>a</sup>, Teng Zhang<sup>\*a</sup>, Junhua Zhang<sup>a</sup>, Baohua Zhao<sup>a</sup>, Chenhao Song<sup>a</sup>, Hang Yin<sup>b</sup>, Shihui Zhu<sup>a</sup>, Xinyu Sun<sup>a</sup>, Heyuan Liu<sup>a</sup>, Yanli Chen<sup>a</sup>, Xiyou Li<sup>\*a</sup>*

*<sup>a</sup>School of Materials Science and Engineering, College of Chemistry and Chemical Engineering, China University of Petroleum (East China) Qingdao, 266580, China.*

*E-mail: :tzhangae@connect.ust.hk, xiyouli@upc.edu.cn*

*<sup>b</sup>School of Physics, State Key Laboratory of Crystal Materials, Shandong University, Jinan, Shandong, 250100, P. R. China.*

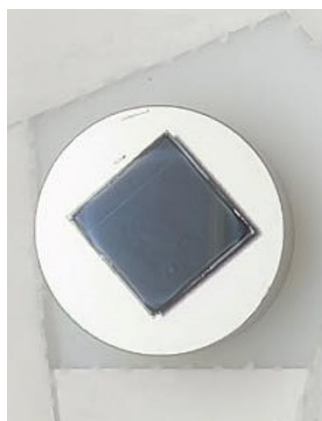

**Spin coating**

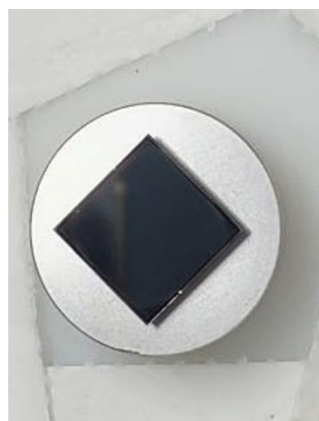

**Dynamic spin coating**

Figure S1. Photographs of the perovskite films prepared under ambient conditions (45% relative humidity) using both spin-coating and dynamic spin-coating methods.

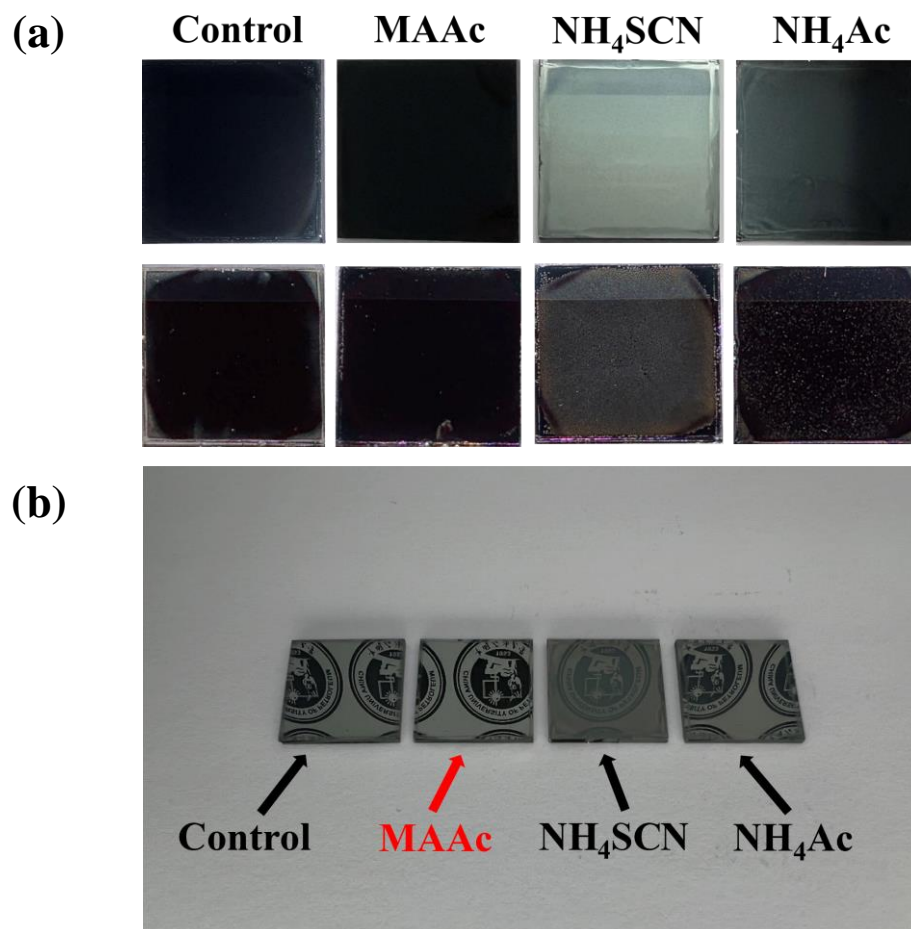

Figure S2. (a) Photographs of the top-view and bottom-view perovskite films prepared without and with the assistance of additives. (b) Mirror-like effect of the prepared perovskite films.

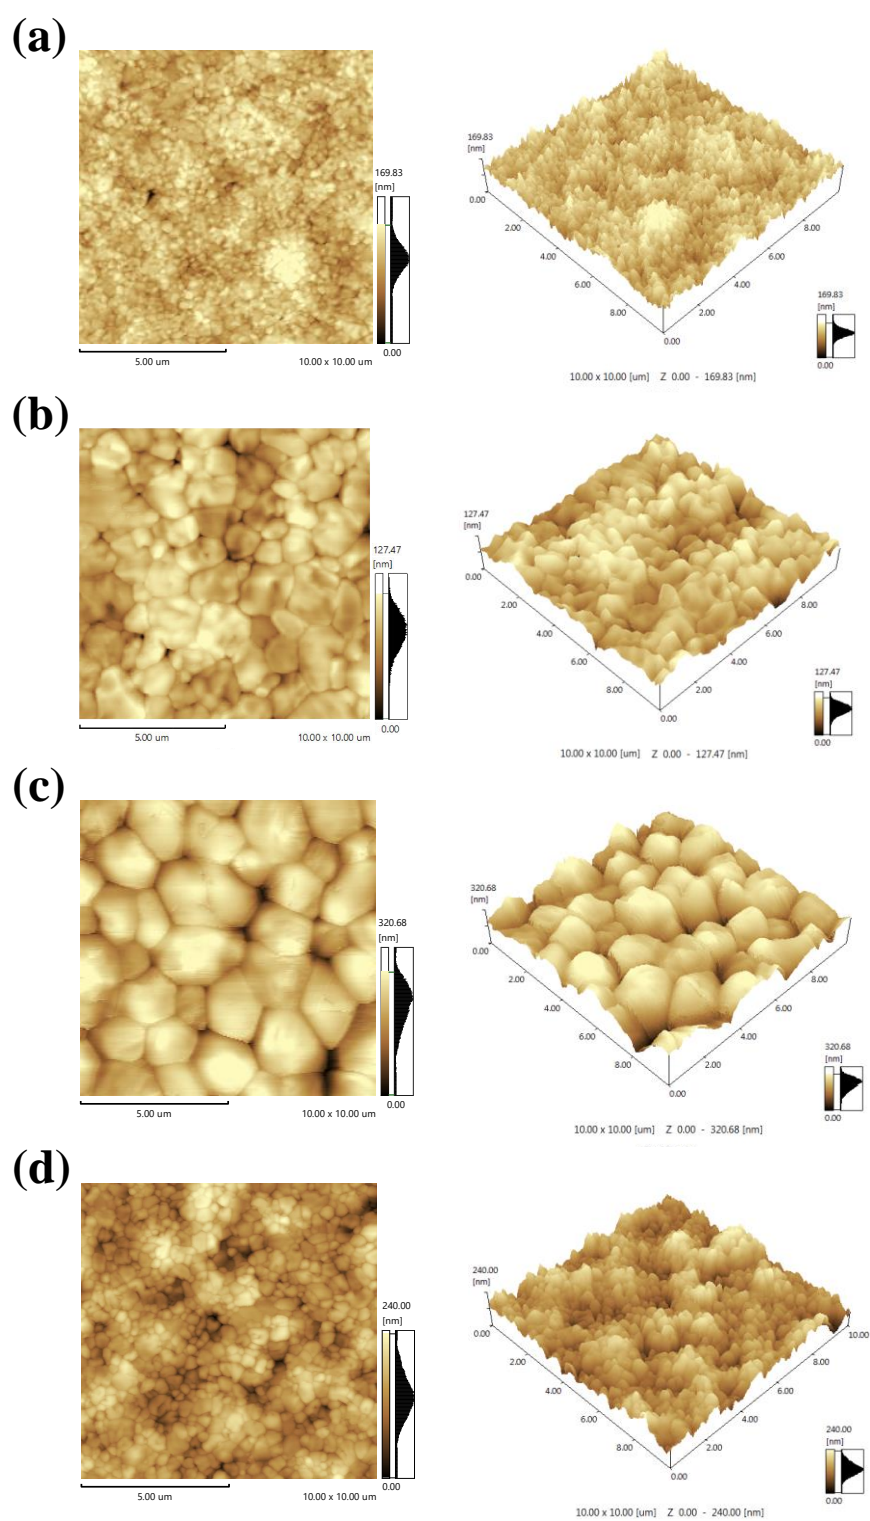

Figure S3. Surface roughness characterization of the perovskite films with the AFM technique, (a) control, (b) MAAC-regulated, (c) NH<sub>4</sub>SCN-regulated, (d) NH<sub>4</sub>Ac-regulated.

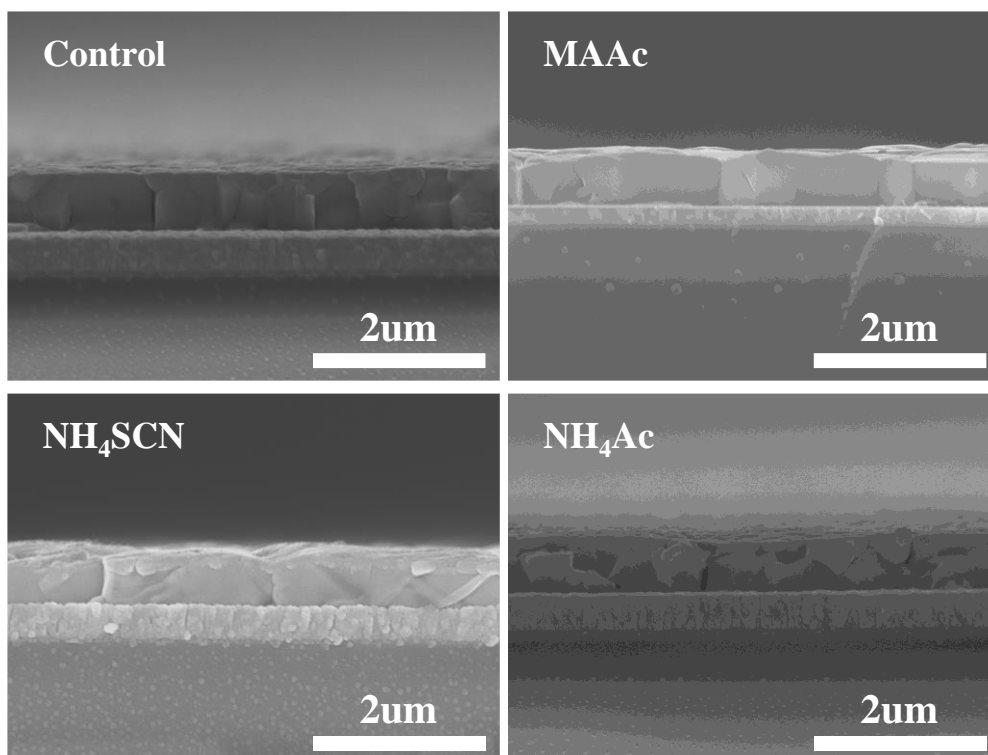

Figure S4. Cross-sectional SEM images of the control and additive-regulated perovskite films, (a) control, (b)MAAc-regulated, (c) NH<sub>4</sub>SCN-regulated, (d) NH<sub>4</sub>Ac-regulated. The scale bar is 2um.

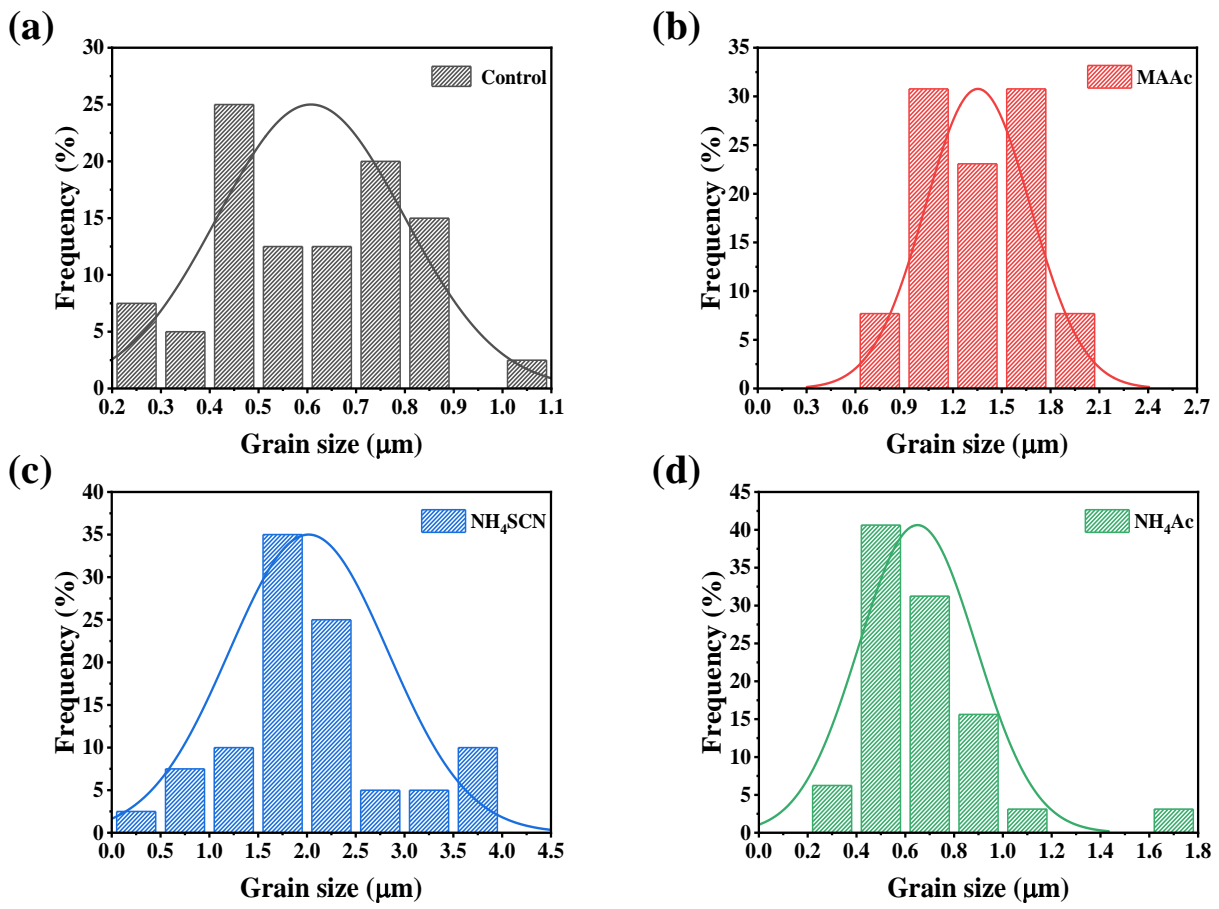

Figure S5. Grain size distribution of the perovskite films calculated from the top-view SEM images.

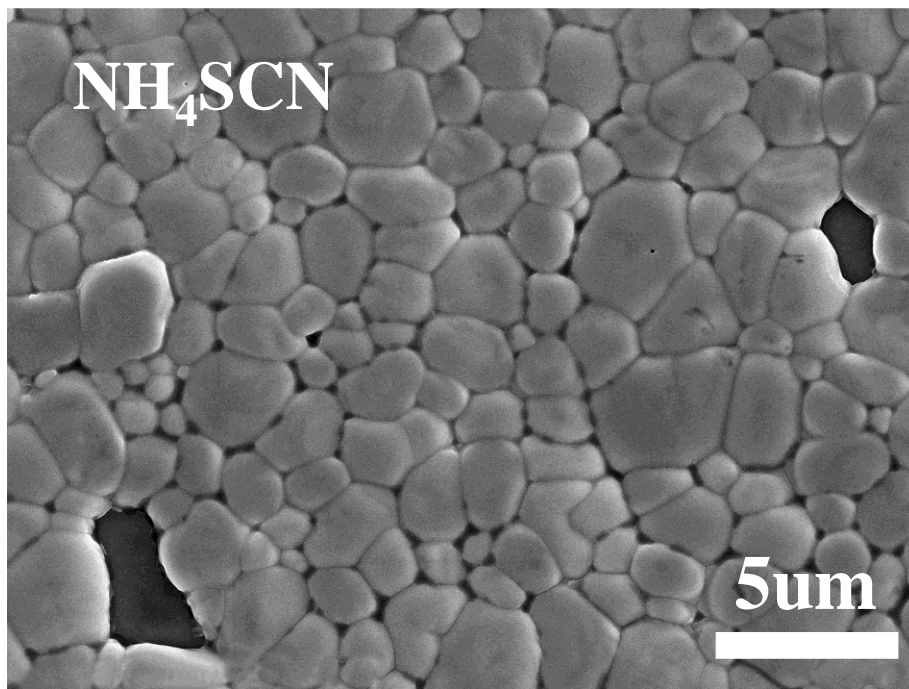

Figure S6. Enlarged top-view SEM image of the  $\text{NH}_4\text{SCN}$ -regulated perovskite film.

The scale bar is 5um.

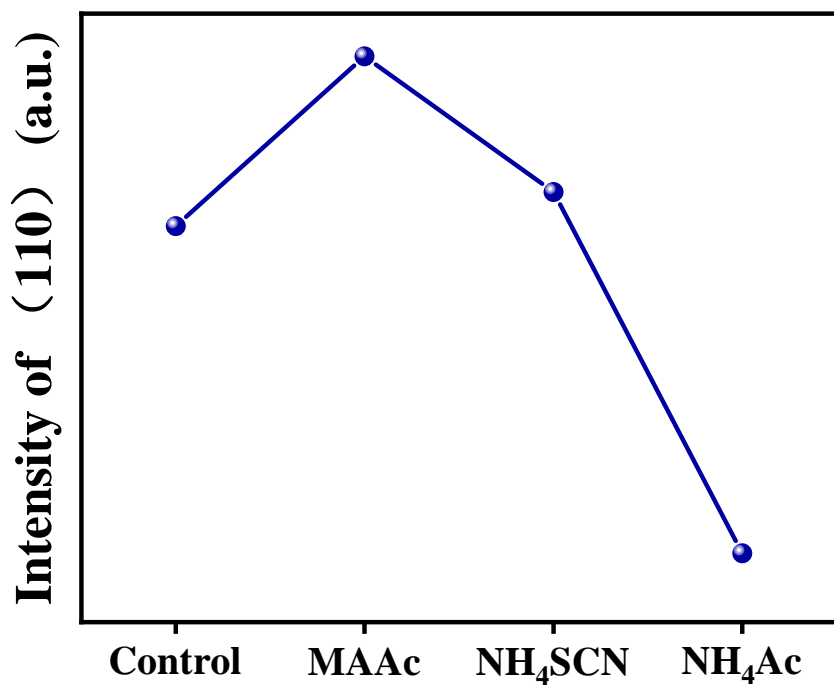

Figure S7. The influence of different additives on the absolute intensity of the (100) peak summarized from Figure 2b.



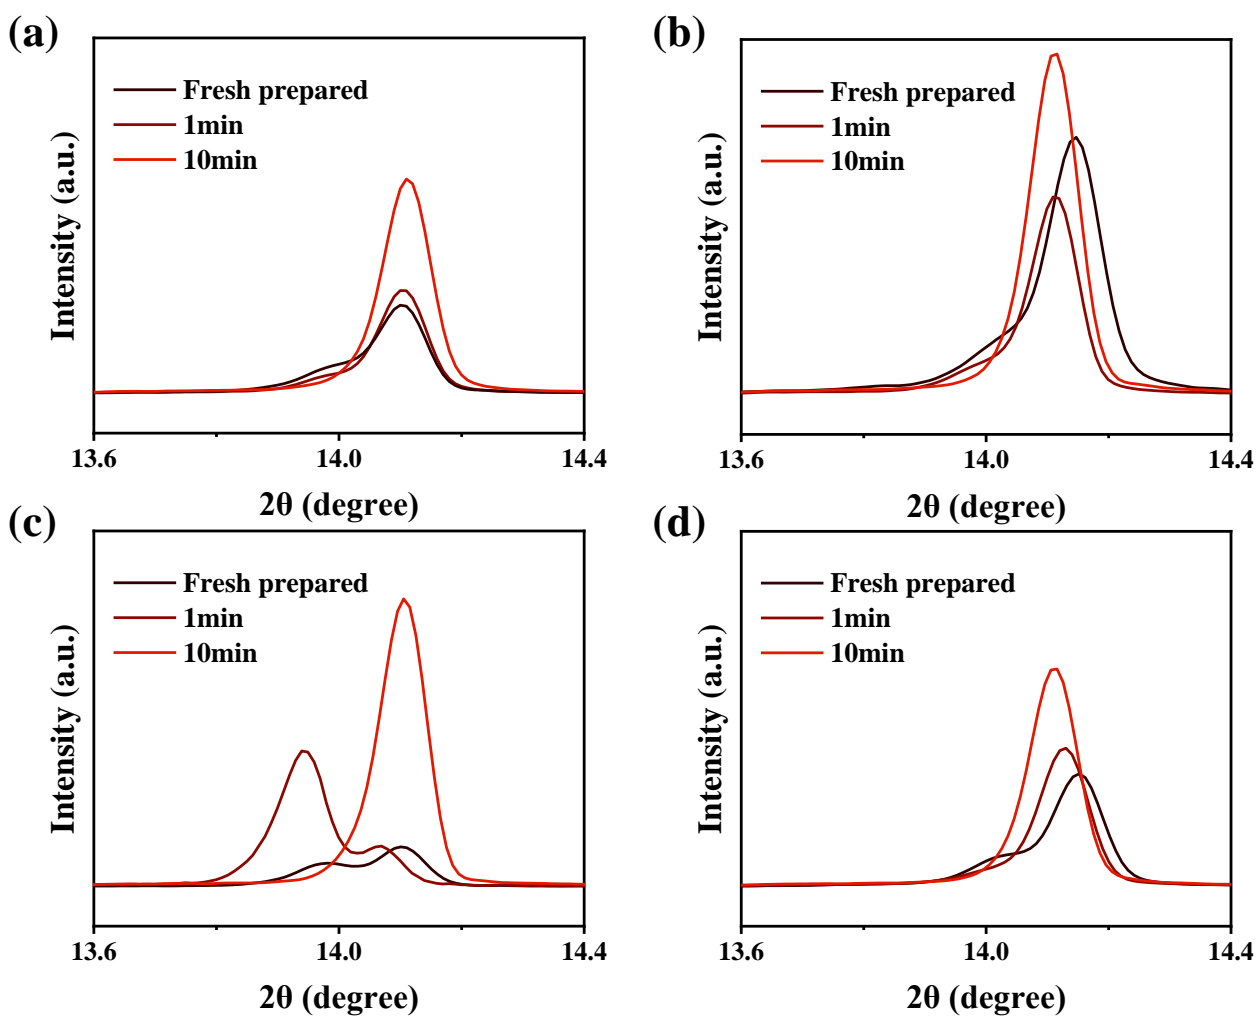

Figure S8. The influence of thermal annealing time on the crystallization process of the fresh prepared films, (a) control, (b) MAAC-regulated, (c)  $\text{NH}_4\text{SCN}$ -regulated, (d)  $\text{NH}_4\text{Ac}$ -regulated.

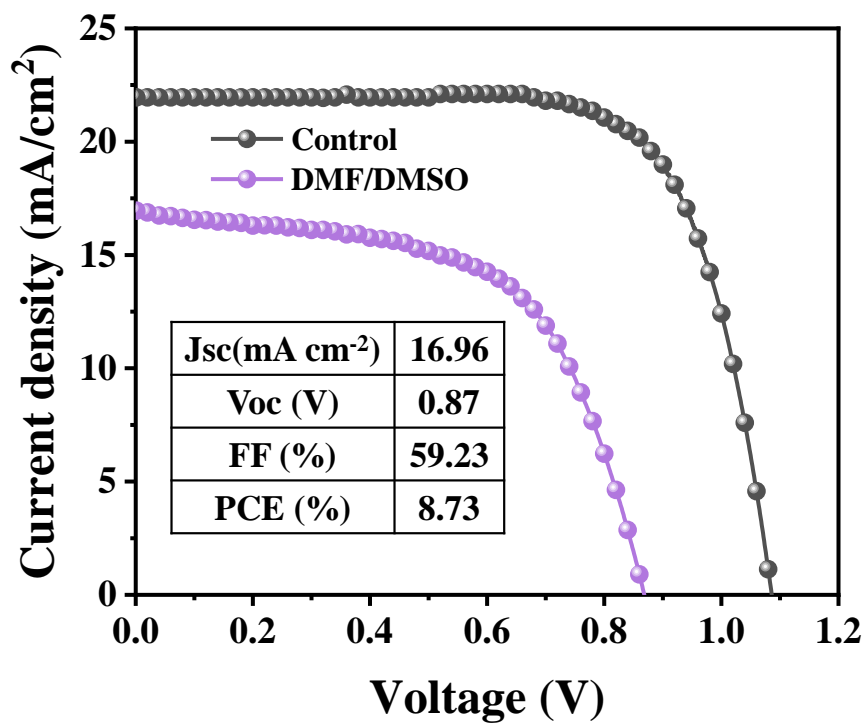

Figure S9.  $J-V$  characteristics of the anisole treated perovskite solar cells deposited in ambient conditions.

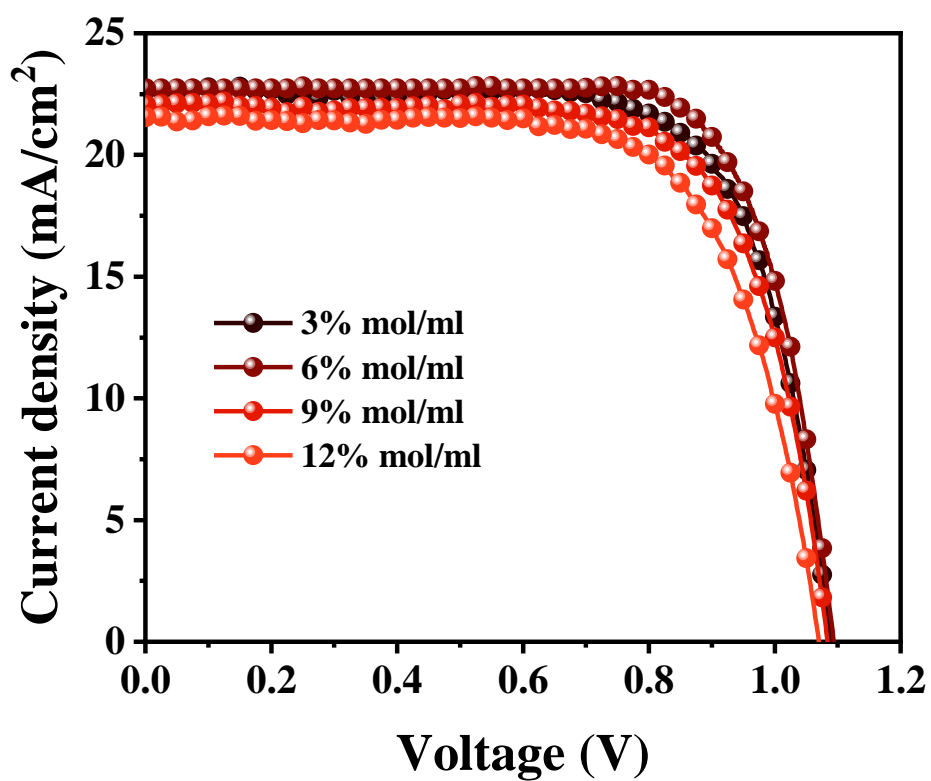

Figure S10. The influence of the MAAc ratio on the  $J$ - $V$  characterization of the ambient processed PSCs.

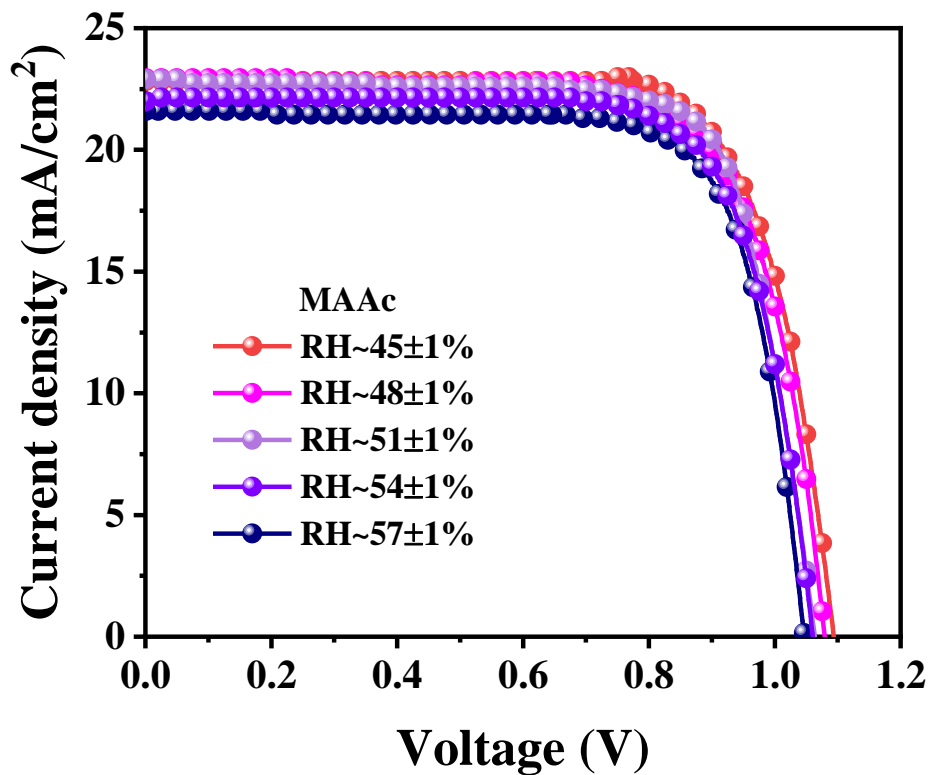

Figure S11. The influence of humidity on the  $J-V$  characterization of the ambient processed MAAc-regulated PSCs.

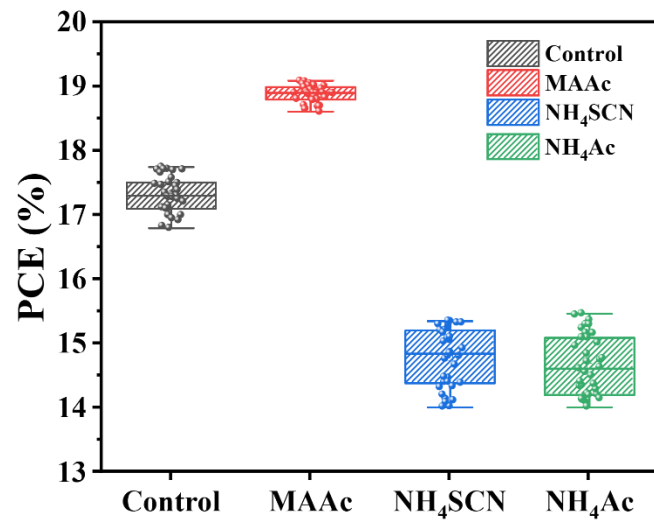

Figure S12. PCE box plots of the control and additive-modified PSCs (35 devices in each condition).

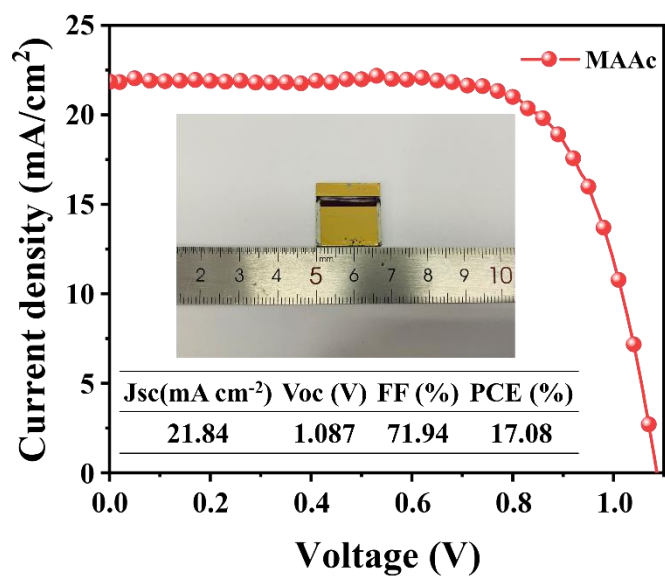

Figure S13.  $J-V$  curves and device parameters for large-scale devices (with an effective area of  $1 \text{ cm}^2$ ).

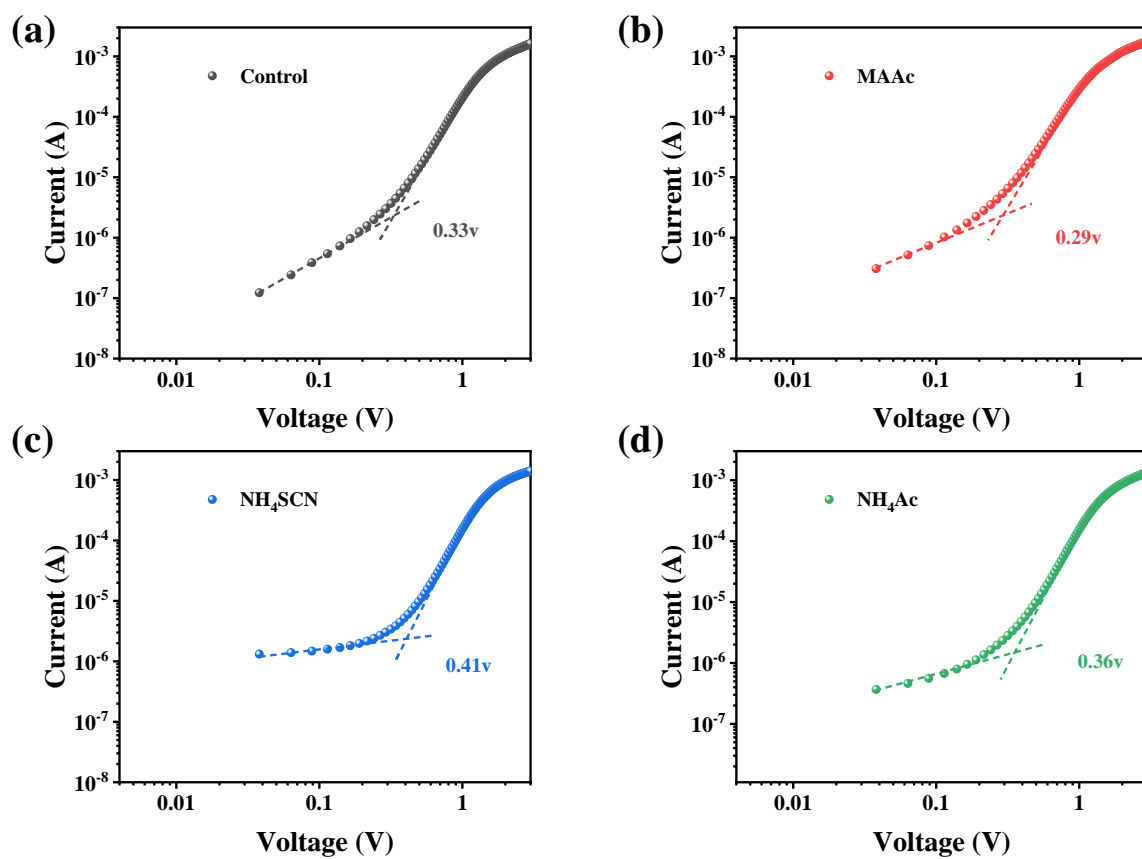

Figure S14. Dark condition  $J$ - $V$  curves of the (a) control, (b)MAAc-regulated, (c)  $\text{NH}_4\text{SCN}$ -regulated, (d)  $\text{NH}_4\text{Ac}$ -regulated perovskite films with the device structure of Au/Spiro-OMeTAD/Perovskite (600 nm)/PEDOT:PSS/ITO.

Table S1. The weight loss of the perovskite precursor before and after the TGA characterization.

|                     | 25°C<br>(mg) | 40°C<br>(mg) | After<br>(mg) | Final percentage<br>(%) |
|---------------------|--------------|--------------|---------------|-------------------------|
| Control             | 17.3013      | 9.2680       | 7.7434        | 83.55                   |
| MAAc                | 17.3696      | 9.3363       | 7.7389        | 82.89                   |
| NH <sub>4</sub> SCN | 17.3584      | 9.3251       | 7.7389        | 82.99                   |
| NH <sub>4</sub> Ac  | 17.3591      | 9.3258       | 7.7386        | 82.98                   |



Table S2. Summary of the cell parameters for control and additive-regulated PSCs.

|                     | $J_{sc}$ (mA cm <sup>-2</sup> ) | $V_{oc}$ (V) | FF (%) | PCE (%) |
|---------------------|---------------------------------|--------------|--------|---------|
| Control             | 21.954                          | 1.086        | 74.45  | 17.75   |
| MAAc                | 22.736                          | 1.099        | 76.41  | 19.09   |
| NH <sub>4</sub> SCN | 21.694                          | 0.970        | 73.09  | 15.38   |
| NH <sub>4</sub> Ac  | 21.839                          | 1.007        | 70.54  | 15.51   |

Table S3. A summary PCEs for PSCs prepared by spin coating under the high humidity.

| Structures                                                                                  | Methods              | Humidity (%) | PCE (%) | Ref.      |
|---------------------------------------------------------------------------------------------|----------------------|--------------|---------|-----------|
| FTO/TiO <sub>2</sub> /MAPbI <sub>3</sub> /Spiro-OMeTAD/Ag                                   | Spin-coating         | 50           | 15.76   | [1]       |
| FTO/TiO <sub>2</sub> /MAPbI <sub>3</sub> /Spiro-OMeTAD/Ag                                   | Spin-coating         | 55           | 18.2    | [2]       |
| ITO/SnO <sub>2</sub> /MAPb(I <sub>1-x</sub> Br <sub>x</sub> ) <sub>3</sub> /Spiro-OMeTAD/Au | Dynamic spin-coating | 45-55        | 19.09   | This work |
| ITO/SnO <sub>2</sub> /MAPbI <sub>3</sub> /Spiro-OMeTAD/Ag                                   | Spin-coating         | 60           | 18.34   | [3]       |
| ITO/SnO <sub>2</sub> /MAPbI <sub>3</sub> /Spiro-OMeTAD/Ag                                   | Spin-coating         | 60           | 19.39   | [4]       |
| ITO/Poly-TPD/MAPbI <sub>3</sub> /C <sub>60</sub> /BCP/Ag                                    | Spin-coating         | 70           | 18.11   | [5]       |
| FTO/NiO/MAPbI <sub>3</sub> /PCBM/Ag                                                         | Spin-coating         | 75           | 15      | [6]       |
| ITO/CPTA/BACl/MAPbI <sub>3</sub> /Spiro-OMeTAD/MoO <sub>3</sub> /Au                         | Spin-coating         | Over 80      | 20.05   | [7]       |
| ITO/SnO <sub>2</sub> /FAPbI <sub>3</sub> /Spiro-OMeTAD/MoO <sub>3</sub> /Au                 | Spin-coating         | 70-95        | 24.1    | [8]       |

Table S4. Concentration dependent cell parameters of the MAAc-regulated PSCs.

| Concentration | $J_{sc}$ (mA cm <sup>-2</sup> ) | $V_{oc}$ (V) | FF (%) | PCE (%) |
|---------------|---------------------------------|--------------|--------|---------|
| 3%mol/ml      | 22.741                          | 1.089        | 75.25  | 18.63   |
| 6% mol/ml     | 22.736                          | 1.099        | 76.41  | 19.09   |
| 9% mol/ml     | 22.051                          | 1.083        | 73.71  | 17.60   |
| 12% mol/ml    | 21.561                          | 1.075        | 69.85  | 16.19   |

Table S5. Humidity dependent cell parameters of the MAAC-regulated PSCs.

| Relative Humidity | $J_{sc}$ (mA cm <sup>-2</sup> ) | $V_{oc}$ (V) | FF (%) | PCE (%) |
|-------------------|---------------------------------|--------------|--------|---------|
| 45±1%             | 22.736                          | 1.099        | 76.41  | 19.09   |
| 48±1%             | 22.872                          | 1.081        | 75.24  | 18.60   |
| 51±1%             | 22.702                          | 1.064        | 75.79  | 18.31   |
| 54±1%             | 22.552                          | 1.063        | 75.66  | 18.14   |
| 57±1%             | 22.363                          | 1.053        | 75.72  | 17.83   |

## Reference:

- [1] H.S. Ko, J.W. Lee, N.G. Park, 15.76% efficiency perovskite solar cells prepared under high relative humidity: importance of  $\text{PbI}_2$  morphology in two-step deposition of  $\text{CH}_3\text{NH}_3\text{PbI}_3$ , *J. Mater. Chem. A*, 2015, 3, 8808-8815.
- [2] M.N. Sun, F. Zhang, H.L. Liu, X.G. Li, Y. Xiao, S.R. Wang, Tuning the crystal-growth of perovskite thin-films by adding 2-pyridylthiourea additive for highly efficient and stable solar cells prepared in ambient air, *J. Mater. Chem. A*, 2017, 5, 13448-13456.
- [3] W.T. Wang, J. Sharma, J.W. Chen, C.H. Kao, S.Y. Chen, C.H. Chen, Y.C. Feng, Y. Tai, Nanoparticle-induced fast nucleation of pinhole-free  $\text{PbI}_2$  film for ambient-processed highly-efficient perovskite solar cell, *Nano Energy*, 2018, 49, 109-116.
- [4] R. Cheng, C.C. Chung, H. Zhang, Z.W. Zhou, P. Zhai, Y.T. Huang, H. Lee, S.P. Feng, An air knife-assisted recrystallization method for ambient-process planar perovskite solar cells and its dim-light harvesting, *Small*, 2019, 15, 1804465. 12.
- [5] Y.H. Cheng, X.W. Xu, Y.M. Xie, H.W. Li, J. Qing, C.Q. Ma, C.S. Lee, F. So, S.W. Tsang, 18% high-efficiency air-processed perovskite solar cells made in a humid atmosphere of 70% RH, *Solar RRL*, 2017, 1, 1700097.
- [6] J. Troughton, K. Hooper, T.M. Watson, Humidity resistant fabrication of  $\text{CH}_3\text{NH}_3\text{PbI}_3$  perovskite solar cells and modules, *Nano Energy*, 2017, 39, 60-68.
- [7] L.F. Chao, Y.D. Xia, B.X. Li, G.C. Xing, Y.H. Chen, W. Huang, Room-temperature molten salt for facile fabrication of efficient and stable perovskite solar cells in ambient air, *Chem*, 2019, 5, 995-1006.
- [8] W. Hui, L.F. Chao, H. Lu, F. Xia, Q. Wei, Z.H. Su, T.T. Niu, L. Tao, B. Du, D.L. Li, Y. Wang, H. Dong, S.W. Zuo, B.X. Li, W. Shi, X.Q. Ran, P. Li, H. Zhang, Z.B. Wu, C.X. Ran, L. Song, G.C. Xing, X.Y. Gao, J. Zhang, Y.D. Xia, Y.H. Chen, W. Huang, Stabilizing black-phase formamidinium perovskite formation at room temperature and high humidity, *Science*, 2021, 371, 1359-1364.
